# Supplementary material for: The Associations of Month of Birth With Body Mass Index, Waist Circumference, and Leg Length: Findings From the China Kadoorie Biobank of 0.5 Million Adults
Source: PubMed Central journal article supplement (PMC4340999; doi:10.2188/jea.je20140154), 2015-03-05

eFigure 1. Locations of the 10 survey sites

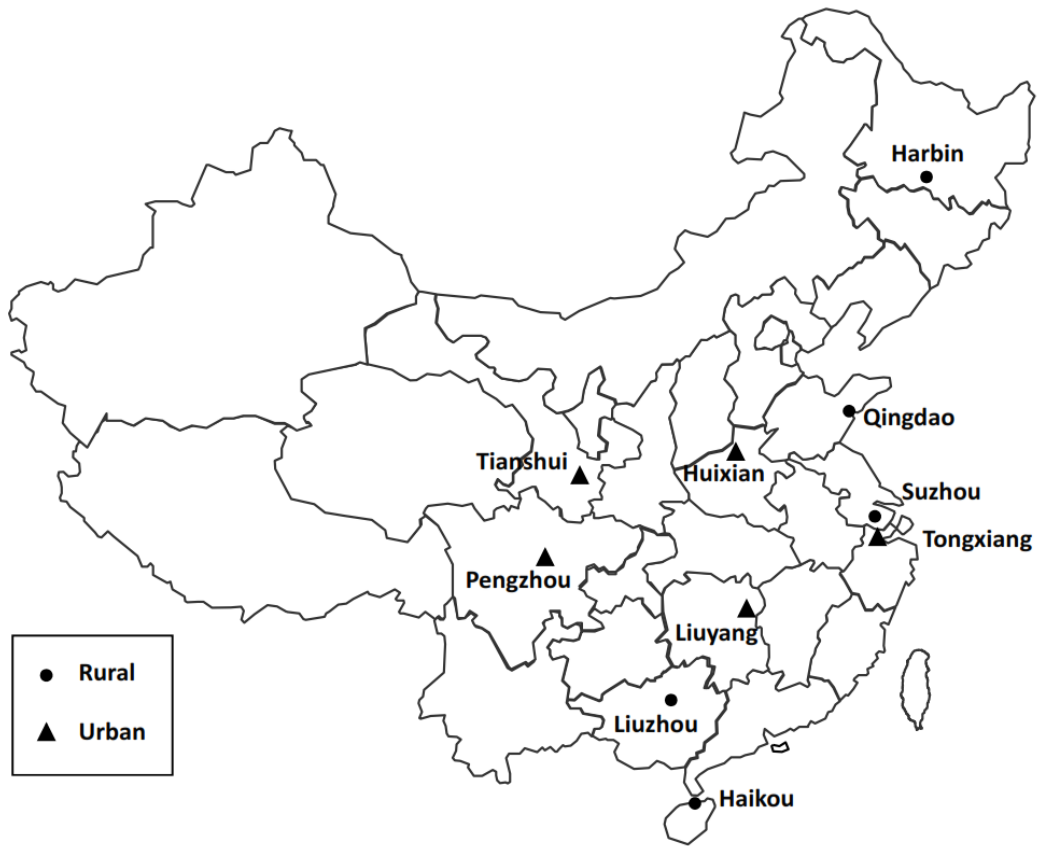

Supplement: je-25-221-s002.pdf [file je-25-221-s002.pdf]
